# Supplementary material for: CRISPR-induced exon skipping is dependent on premature termination codon mutations
Source: PubMed Central journal article supplement (PMC6193291; doi:10.1186/s13059-018-1532-z), 2018-10-17
Supplement: 13059_2018_1532_MOESM3_ESM.pdf [file 13059_2018_1532_MOESM3_ESM.pdf]

## Supplemental Tables

**Table S1. Examples according to the published reports on CRISPR/Cas9-induced exon-skipping and the case reports in clinical.**

| Reference                   | Gene (Gene bank)                 | Method                | Nature of mutation       | PTC in Exon | Exon skipping |
|-----------------------------|----------------------------------|-----------------------|--------------------------|-------------|---------------|
| [1]                         | <i>KRAS</i> (NM_021284.6)        | CRISPR/Cas9           | -2bp in exon 2           | Exon 2      | Exon 2        |
|                             |                                  |                       | -1bp in exon 2           | No          | No            |
|                             | <i>Ctmb1</i> (NM_001098209.1)    | CRISPR/Cas9           | -3bp in exon 3           | No          | No            |
|                             |                                  |                       | +1bp in exon 3           | Exon 3      | Exon 3        |
|                             |                                  |                       | +1bp in exon 3           | Exon 3      | Exon 3, 4     |
| <i>P65</i> (NM_001365067.1) | CRISPR/Cas9                      | +1bp in exon 6        | No                       | No          |               |
| [2]                         | <i>DMD</i> (NM_000109.3)         | CRISPR/Cas9           | -18bp in exon 45         | exon 45     | exon 45       |
|                             |                                  |                       | +1bp in exon 45          | exon 45     | exon 45       |
|                             |                                  |                       | -10bp in exon 45         | No          | No            |
|                             |                                  |                       | -8bp in exon 45          | No          | No            |
|                             |                                  |                       | -7bp in exon 45          | No          | No            |
| [3]                         | <i>Creb3l3a</i> (NM_001020673.1) | CRISPR/Cas9           | g.357C>T in exon 2       | Exon 2      | Exon 2        |
|                             | <i>Pla2g12b</i> (NM_213430.1)    | CRISPR/Cas9           | g.10194A>T in exon 4     | No          | No            |
|                             | <i>Smyd1a</i> (NM_205540.2)      | CRISPR/Cas9           | -7bp in exon 3           | Exon 3      | Exon 3        |
|                             |                                  |                       | -13bp in exon 2          | Exon 2      | Exon 2        |
|                             |                                  |                       | -40bp in exon 2          | Exon 2      | Exon 2        |
| [4]                         | <i>PHACTR1</i> (NM_001242648.2)  | CRISPR/Cas9           | +4bp in exon 8           | Exon 8      | Exon 8        |
|                             |                                  |                       | -1bp in exon 8           | Exon 8      | Exon 8        |
|                             |                                  |                       | -1bp in exon 9           | Exon 9      | Exon 9        |
|                             |                                  |                       | +22 bp in exon 10        | Exon 10     | Exon 10       |
|                             | <i>Adgrl4</i> (NM_213367.2)      | TALEN                 | -5bp in exon 2           | Exon 2      | Exon 2        |
| <i>LGALS8</i> (NM_006499.4) | TALEN                            | p.Leu212Ter in exon 9 | Exon 9                   | Exon 9      |               |
| [5]                         | <i>BRCA1</i> (NM_007294.3)       | Case report           | p. Glu1694Ter in exon 18 | Exon 18     | Exon 18       |
| [6]                         | <i>FBN1</i> (NM_000138.4)        | Case report           | PTC mutations in exon 51 | Exon 51     | Exon 51       |
| [7]                         | <i>CEP290</i> (NM_025114.3)      | Case report           | c.1666del in exon 17     | Exon 18     | Exon 18       |
|                             |                                  |                       | c.508A>T in exon 8       | Exon 8      | Exon 8        |
|                             |                                  |                       | c. 4090G>T in exon 32    | Exon 32     | Exon 32       |
| [8]                         | <i>NF1</i> (NM_000267.3)         | Case report.          | c.4367+1G>C in exon 32   | Exon 32     | Exon 32       |
| [9]                         | <i>LAMB3</i> (NM_000228.2)       | Case report           | c.1903C>T in exon 14     | Exon 14     | Exon 14       |
| [10]                        | <i>LAMB3</i> (NM_000228.2)       | Case report           | c.1978C>T in exon 15     | Exon 15     | Exon 15       |
| [11]                        | <i>LAMC2</i> (NM_005562.2)       | Case report           | c.1045C>T in exon 8      | Exon 8      | Exon 8        |
| [12]                        | <i>LAMA3</i> (NM_000227.4)       | Case report           | c.3928A>T in exon 30     | Exon 30     | Exon 30       |
| [13]                        | <i>LAMA2</i> (NM_000426.3)       | Case report           | p. Arg744Stop in exon 15 | Exon 15     | Exon 15       |

|      |                                 |             |                                                                                    |                            |                            |
|------|---------------------------------|-------------|------------------------------------------------------------------------------------|----------------------------|----------------------------|
| [14] | <i>COL11A2</i> (NM_001163771.1) | Case report | p. Arg893Stop in exon 57                                                           | Exon 57                    | Exon 57                    |
| [15] | <i>CFTR</i> (NM_000492.3)       | Case report | p. Arg553X in exon 11                                                              | Exon 11                    | Exon 11                    |
| [16] | <i>AAAS</i> (NM_001173466.1)    | Case report | c.1331+1G>A in exon 14                                                             | Exon 14                    | Exon 14                    |
| [17] | <i>DOCK9</i> (NM_001130048.1)   | Case report | c. 2262A>C in exon 20                                                              | Exon 20                    | Exon 20                    |
| [18] | <i>CASC5</i> (NM_144508.4)      | Case report | c. 6673-19T>A in exon 25                                                           | Exon 25                    | Exon 25                    |
| [19] | <i>NFI</i> (NM_000267.3)        | Case report | p. Trp336X in exon 7<br>p. Gln315X in exon 7<br>p. Arg304X in exon 7               | Exon 7<br>Exon 7<br>Exon 7 | Exon 7<br>Exon 7<br>Exon 7 |
| [20] | <i>PS</i> (NM_000267.3)         | Case report | p. Ser62Stop in exon 4                                                             | Exon 4                     | Exon 4                     |
| [21] | <i>ACY1</i> (NM_000666.2)       | Case report | c.1001+5del6 in exon 13                                                            | Exon 13                    | Exon 13                    |
| [22] | <i>CYP27B1</i> (NM_000785.3)    | Case report | c.1022-1037del16: p in exon 7<br>c. 934_935delAC in exon 7<br>c.1215 T>C in exon 7 | Exon 7<br>Exon 7<br>No     | Exon 7<br>Exon 7<br>No     |
| [23] | <i>FANCM</i> (NM_001308133.1)   | Case report | c.5791C>T in exon 22                                                               | Exon 22                    | Exon 22                    |

### Reference:

1. Mou H, Smith JL, Peng L, Yin H, Moore J, Zhang XO, Song CQ, Sheel A, Wu Q, Ozata DM, et al: **CRISPR/Cas9-mediated genome editing induces exon skipping by alternative splicing or exon deletion.** *Genome Biol* 2017, **18**:108.
2. Li HL, Fujimoto N, Sasakawa N, Shirai S, Ohkame T, Sakuma T, Tanaka M, Amano N, Watanabe A, Sakurai H, et al: **Precise correction of the dystrophin gene in duchenne muscular dystrophy patient induced pluripotent stem cells by TALEN and CRISPR-Cas9.** *Stem Cell Reports* 2015, **4**:143-154.
3. Anderson JL, Mulligan TS, Shen MC, Wang H, Scahill CM, Tan FJ, Du SJ, Busch-Nentwich EM, Farber SA: **mRNA processing in mutant zebrafish lines generated by chemical and CRISPR-mediated mutagenesis produces unexpected transcripts that escape nonsense-mediated decay.** *PLoS Genet* 2017, **13**:e1007105.
4. Lalonde S, Stone OA, Lessard S, Lavertu A, Desjardins J, Beaudoin M, Rivas M, Stainier DYR, Lettre G: **Frameshift indels introduced by genome editing can lead to in-frame exon skipping.** *PLoS One* 2017, **12**:e0178700.
5. Liu HX, Cartegni L, Zhang MQ, Krainer AR: **A mechanism for exon skipping caused by nonsense or missense mutations in BRCA1 and other genes.** *Nat Genet* 2001, **27**:55-58.
6. Dietz HC, Valle D, Francomano CA, Kendzior RJ, Jr., Pyeritz RE, Cutting GR: **The skipping of constitutive exons in vivo induced by nonsense mutations.** *Science* 1993,

- 259:680-683.
7. Barny I, Perrault I, Michel C, Soussan M, Goudin N, Rio M, Thomas S, Attie-Bitach T, Hamel C, Dollfus H, et al: **Basal exon skipping and nonsense-associated altered splicing allows bypassing complete CEP290 loss-of-function in individuals with unusually mild retinal disease.** *Hum Mol Genet* 2018.
  8. Fu Y, Zhang JQ, Jiang CL, Wang HY: **Identification of a missense mutation causing exon skipping in a neurofibromatosis type 1 patient.** *J Dermatol* 2018.
  9. Pulkkinen L, Christiano AM, Gerecke D, Wagman DW, Burgeson RE, Pittelkow MR, Uitto J: **A homozygous nonsense mutation in the beta 3 chain gene of laminin 5 (LAMB3) in Herlitz junctional epidermolysis bullosa.** *Genomics* 1994, **24**:357-360.
  10. Kivirikko S, McGrath JA, Pulkkinen L, Uitto J, Christiano AM: **Mutational hotspots in the LAMB3 gene in the lethal (Herlitz) type of junctional epidermolysis bullosa.** *Hum Mol Genet* 1996, **5**:231-237.
  11. Takizawa Y, Shimizu H, Pulkkinen L, Nonaka S, Kubo T, Kado Y, Nishikawa T, Uitto J: **Novel premature termination codon mutations in the laminin gamma2-chain gene (LAMC2) in Herlitz junctional epidermolysis bullosa.** *J Invest Dermatol* 1998, **111**:1233-1234.
  12. Muhle C, Jiang QJ, Charlesworth A, Bruckner-Tuderman L, Meneguzzi G, Schneider H: **Novel and recurrent mutations in the laminin-5 genes causing lethal junctional epidermolysis bullosa: molecular basis and clinical course of Herlitz disease.** *Hum Genet* 2005, **116**:33-42.
  13. Di Blasi C, He Y, Morandi L, Cornelio F, Guicheney P, Mora M: **Mild muscular dystrophy due to a nonsense mutation in the LAMA2 gene resulting in exon skipping.** *Brain* 2001, **124**:698-704.
  14. Vuoristo MM, Pappas JG, Jansen V, Ala-Kokko L: **A stop codon mutation in COL11A2 induces exon skipping and leads to non-ocular Stickler syndrome.** *Am J Med Genet A* 2004, **130A**:160-164.
  15. Hull J, Shackleton S, Harris A: **The stop mutation R553X in the CFTR gene results in exon skipping.** *Genomics* 1994, **19**:362-364.
  16. Kallabi F, Ben Rhouma B, Baklouti S, Ghorbel R, Felhi R, Keskes L, Kamoun H: **Splicing Defects in the AAAS Gene Leading to both Exon Skipping and Partial Intron Retention in a Tunisian Patient with Allgrove Syndrome.** *Horm Res Paediatr* 2016, **86**:90-93.
  17. Karolak JA, Rydzanicz M, Ginter-Matuszewska B, Pitarque JA, Molinari A, Bejjani BA, Gajecka M: **Variant c.2262A>C in DOCK9 Leads to Exon Skipping in Keratoconus Family.** *Invest Ophthalmol Vis Sci* 2015, **56**:7687-7690.
  18. Szczepanski S, Hussain MS, Sur I, Altmuller J, Thiele H, Abdullah U, Waseem SS, Moawia A, Nurnberg G, Noegel AA, et al: **A novel homozygous splicing mutation of CASC5 causes primary microcephaly in a large Pakistani family.** *Hum Genet* 2016, **135**:157-170.
  19. Wimmer K, Eckart M, Stadler PF, Rehder H, Fonatsch C: **Three different premature stop codons lead to skipping of exon 7 in neurofibromatosis type I patients.** *Hum Mutat* 2000, **16**:90-91.
  20. Okamoto Y, Yamazaki T, Katsumi A, Kojima T, Takamatsu J, Nishida M, Saito H: **A novel**

- nonsense mutation associated with an exon skipping in a patient with hereditary protein S deficiency type I.** *Thromb Haemost* 1996, **75**:877-882.
21. Ferri L, Funghini S, Fioravanti A, Biondi EG, la Marca G, Guerrini R, Donati MA, Morrone A: **Aminoacylase I deficiency due to ACY1 mRNA exon skipping.** *Clin Genet* 2014, **86**:367-372.
  22. Demir K, Kattan WE, Zou M, Durmaz E, BinEssa H, Nalbantoglu O, Al-Rijjal RA, Meyer B, Ozkan B, Shi Y: **Novel CYP27B1 Gene Mutations in Patients with Vitamin D-Dependent Rickets Type 1A.** *PLoS One* 2015, **10**:e0131376.
  23. Peterlongo P, Catucci I, Colombo M, Caleca L, Mucaki E, Bogliolo M, Marin M, Damiola F, Bernard L, Pensotti V, et al: **FANCM c.5791C>T nonsense mutation (rs144567652) induces exon skipping, affects DNA repair activity and is a familial breast cancer risk factor.** *Hum Mol Genet* 2015, **24**:5345-5355.

**Table S2. PCR primers for genotyping of the gene editing rabbits**

| Name        | Primers         | Sequence(5'-3')          | Produce size (bp) |
|-------------|-----------------|--------------------------|-------------------|
| <i>DMD</i>  | <i>DMD-51-F</i> | TAGTTTGGCTCAGATTGTAG     | 507               |
|             | <i>DMD-51-R</i> | AGAATAGACAAAGCAGTGTG     |                   |
| <i>ANO5</i> | <i>ANO5-F</i>   | CCCATATGCCTTGTCTATT      | 492               |
|             | <i>ANO5-R</i>   | GCATGATTAGGAACCCTTT      |                   |
| <i>LMNA</i> | <i>LMNA-F</i>   | GAAGGGTGGAGAGACAGGAA     | 490               |
|             | <i>LMNA-R</i>   | GCTACATCCAATGAGTGAAAGA   |                   |
| <i>GHR</i>  | <i>GHR-F</i>    | CATTGGGTGCACCTCCTAGATAC  | 713               |
|             | <i>GHR-R</i>    | CACACTCACACTCATCCATACA   |                   |
| <i>DMD</i>  | <i>DMD-20-F</i> | TCTTTCAGCCTGTGACTTCAG    | 421               |
|             | <i>DMD-20-R</i> | GTGGCTTAGCTAAATCTGTAGGA  |                   |
| <i>GCK</i>  | <i>GCK-F</i>    | GTGCCCCAGTCCACCATGGAG    | 626               |
|             | <i>GCK-R</i>    | CCAACAGCCTCTGCCGGGTTG    |                   |
| <i>MSTN</i> | <i>MSTN-F</i>   | GGCCCAGTGGATCTAAATGAA    | 449               |
|             | <i>MSTN-R</i>   | AGACTGTCTTTCCTGCTTCTTAC  |                   |
| <i>TIA1</i> | <i>TIA1-F</i>   | GGCATTACTGTTACGTTGGTATTT | 459               |
|             | <i>TIA1-R</i>   | GGCAGACATCCAGCATCTT      |                   |
| <i>TYR</i>  | <i>TYR-F</i>    | ATCCGCTCAAGCAGGTATTG     | 454               |
|             | <i>TYR-R</i>    | AGTGAGGTAGGCAAGGAATTTG   |                   |
| <i>OXT</i>  | <i>OXT-F</i>    | GCAAGGTGAGTGTTACAGG      | 609               |
|             | <i>OXT-R</i>    | TATTATTCCTGGGAGTGGCTGA   |                   |

*DMD-51*, the primer used for Fig.S1. *DMD-20*, the primer used for Fig.S5. *OXT*, the primer used for Fig.S10 .

**Table S3. Primers for RT-PCR analysis of exon skipping.**

| Name        | Primers          | Sequence(5'-3')         | Produce size (bp) |
|-------------|------------------|-------------------------|-------------------|
| <i>DMD</i>  | <i>DMD</i> -51-F | GTCAACTATCTACTGCAAGAGC  | 459               |
|             | <i>DMD</i> -51-R | CTGTACTTCATCCCACTGATTC  |                   |
| <i>ANO5</i> | <i>ANO5</i> -F   | CGACAAGCCACATTGGAATAC   | 610               |
|             | <i>ANO5</i> -R   | ACTGAGTCGTCAGTTCGATTAG  |                   |
| <i>LMNA</i> | <i>LMNA</i> -F   | CATCAAGGCCGCTACGAG      | 418               |
|             | <i>LMNA</i> -R   | CAGCTCCTCGCTGTAGATGTT   |                   |
| <i>GHR</i>  | <i>GHR</i> -F    | CACTAGCAGGGTCAAGTGATG   | 478               |
|             | <i>GHR</i> -R    | TCTGCATGAATCCCGGTTAAG   |                   |
| <i>DMD</i>  | <i>DMD</i> -20-F | TGGTGGAACAGATGGTGAATG   | 492               |
|             | <i>DMD</i> -20-R | TGGTACTGATCGTCTCCTGATAG |                   |
| <i>GCK</i>  | <i>GCK</i> -F    | GAGGACCTGAAGAAGGTGATG   | 466               |
|             | <i>GCK</i> -R    | CCACGATGTTGTTCCCTTCA    |                   |
| <i>MSTN</i> | <i>MSTN</i> -F   | TTATCACGCTACGACGGAAAC   | 494               |
|             | <i>MSTN</i> -R   | GCTCATCACAGTCAAGACCAA   |                   |
| <i>TYR</i>  | <i>TYR</i> -F    | ACTACGAGCCCAGACTATGT    | 432               |
|             | <i>TYR</i> -R    | GCTCTGTCCGGCTATTGTACTC  |                   |
| <i>TIAI</i> | <i>TIAI</i> -F   | GTTCGGTTCAACTCCCATGA    | 291               |
|             | <i>TIAI</i> -R   | GGAAGACTGCGTCTGGTTAAA   |                   |
| <i>OXT</i>  | <i>OXT</i> -F    | GCTGACCTCGGCCTGCTACAT   | 331               |
|             | <i>OXT</i> -R    | GCGCTCGGAGAAGCGGCCTCG   |                   |

*DMD*-51, the primer used for Fig.S1. *DMD*-20, the primer used for Fig.S5. *OXT*, the primer used for Fig.S10.

**Table S4. Primers for qPCR analysis.**

| Name        | Primers         | Sequence(5'-3')         | Produce size (bp) |
|-------------|-----------------|-------------------------|-------------------|
| <i>MSTN</i> | <i>MSTN</i> -F1 | GCTCTTTGGAAGATGACGATTA  | 109               |
|             | <i>MSTN</i> -R1 | AAGAAGCAACATTTGGGTTT    |                   |
|             | <i>MSTN</i> -F2 | CCTGAGGCTCATCAAACCTATG  | 106               |
|             | <i>MSTN</i> -R2 | CACATCAATGCTCTGCCAAATAC |                   |
| <i>TYR</i>  | <i>TYR</i> -F1  | GCTGTGATGTTTGTACAGATGAG | 113               |
|             | <i>TYR</i> -R1  | CTCCAACCGGCTACAGATAAT   |                   |
|             | <i>TYR</i> -F2  | CCATGCGTTTGTGACAGTATT   | 111               |
|             | <i>TYR</i> -F2  | ATGTAGGATTCCCGGTTGTG    |                   |
| <i>TIA1</i> | <i>TIA1</i> -F1 | CACAACAGATTGGCCAGTACAT  | 116               |
|             | <i>TIA1</i> -R1 | CATCCACGGTGCGGAAGAC     |                   |
|             | <i>TIA1</i> -F2 | CGAAGGGATATGGCTTTGTCT   | 112               |
|             | <i>TIA1</i> -F2 | GTTGCCAGTTAGTTCTGATTTG  |                   |
